# Supplementary material for: Comparative Genomics of Bacillus thuringiensis Reveals a Path to Specialized Exploitation of Multiple Invertebrate Hosts
Source: PubMed Central journal article supplement (PMC5550751; doi:10.1128/mbio.00822-17), 2017-08-08

4BK1

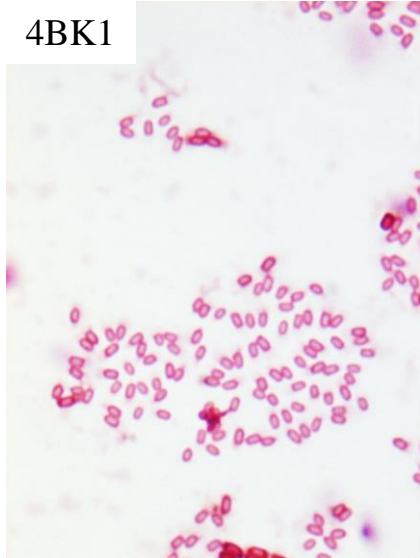

CTC

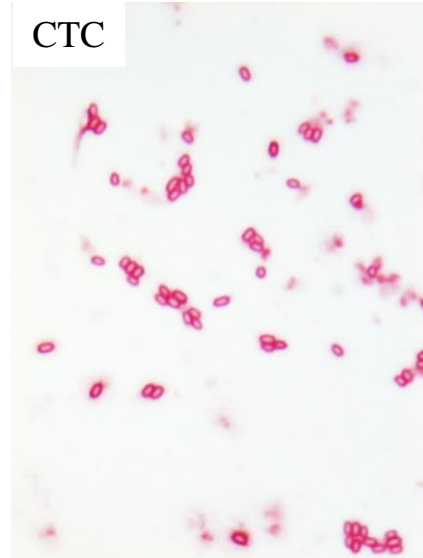

4BJ1

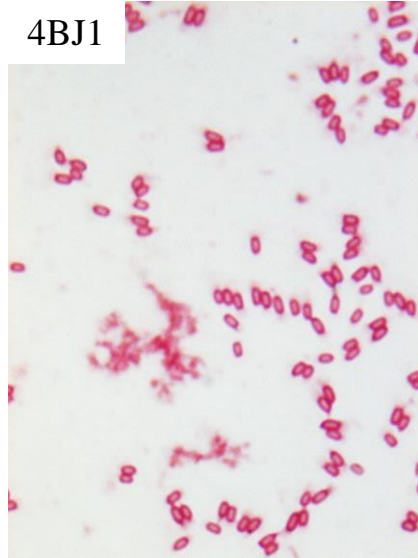

4BK1

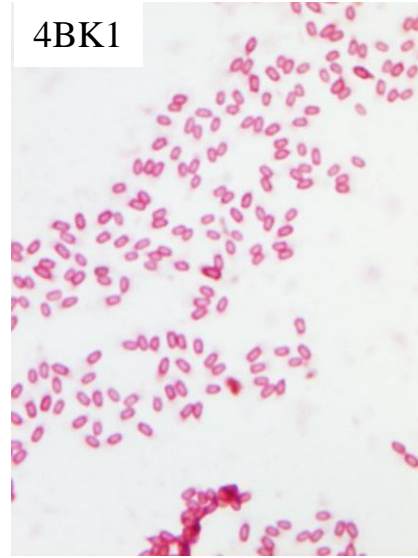

4H1

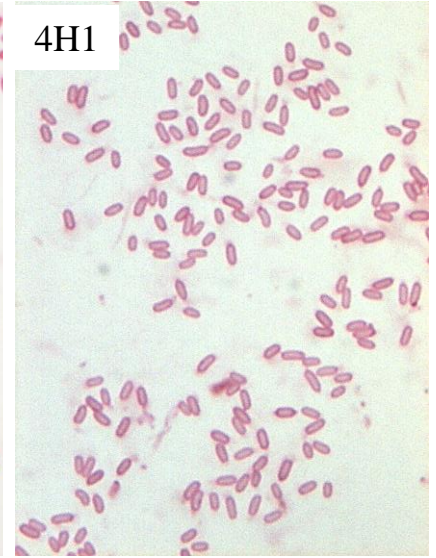

T68001

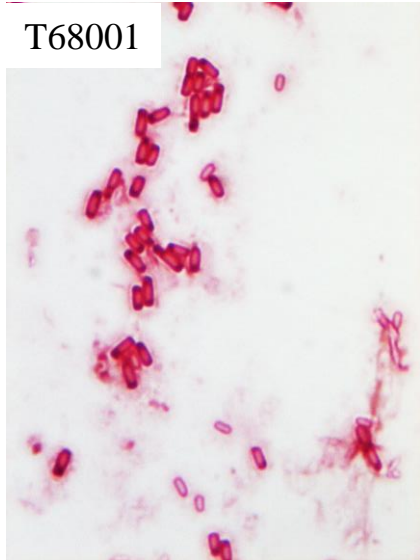

4AY1

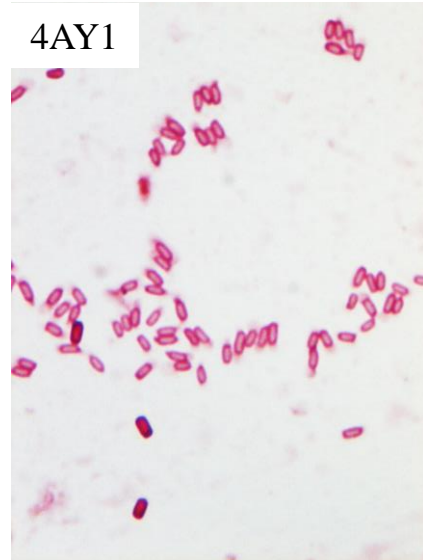

4AS1

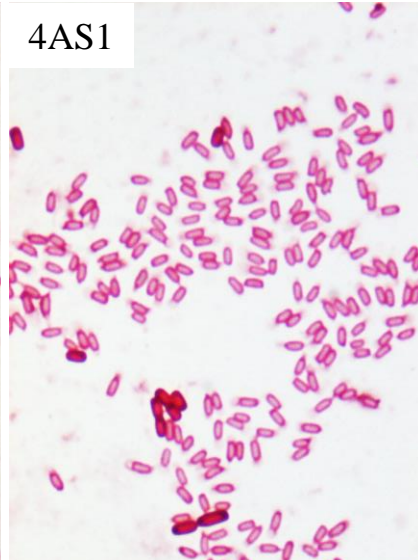

4BA1

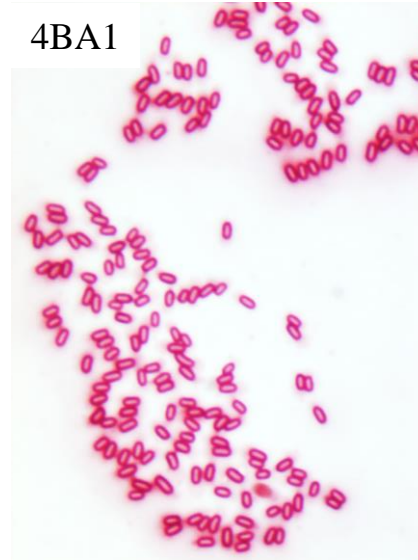

4BY1

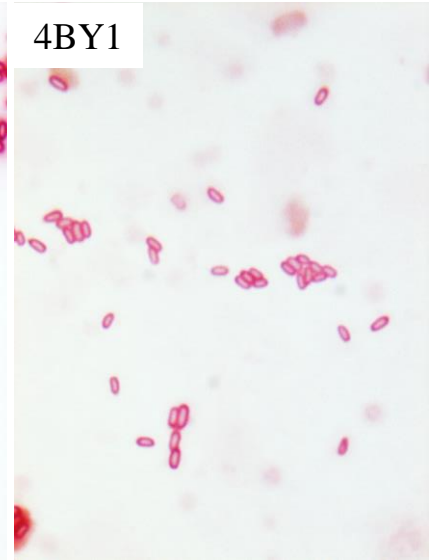

4Z1

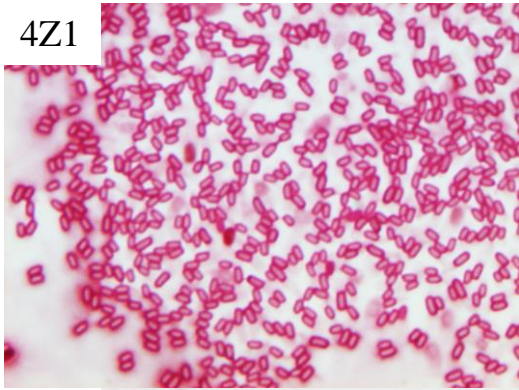

4V1

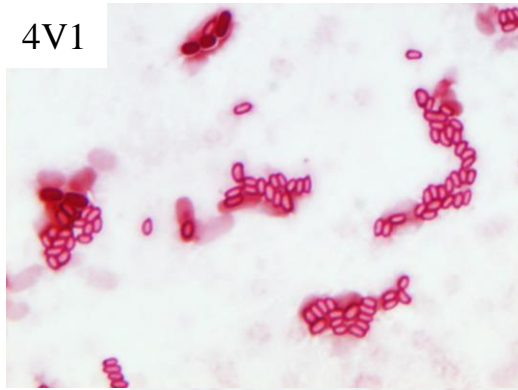

4U1

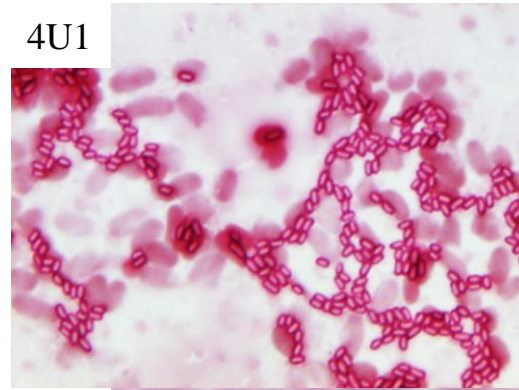

h16

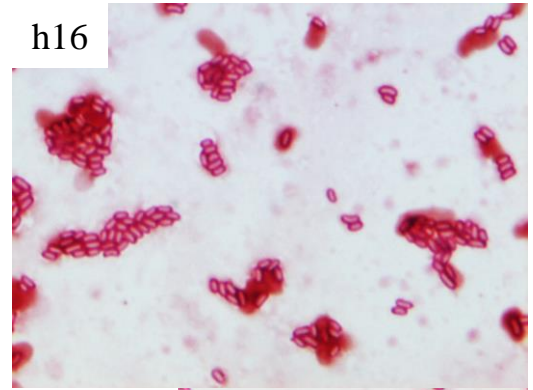

4R1

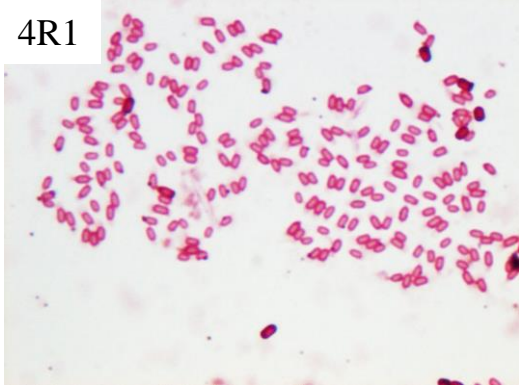

4AZ1

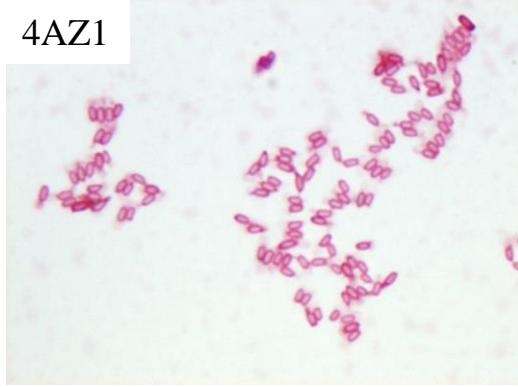

4H2

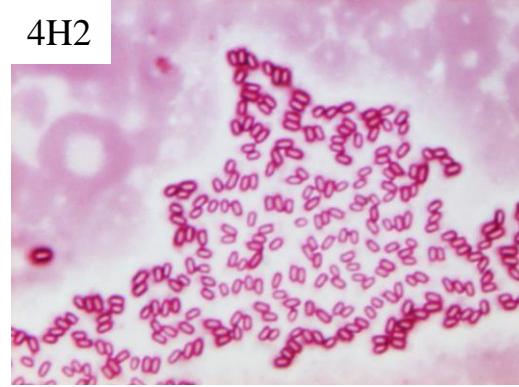

T69001

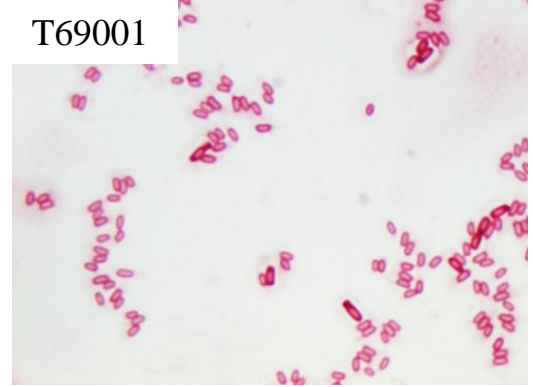

Supplement: mbo004173420sf5.pdf [file mbo004173420sf5.pdf]
