# Supplementary material for: Comparative Genomics of Bacillus thuringiensis Reveals a Path to Specialized Exploitation of Multiple Invertebrate Hosts
Source: PubMed Central journal article supplement (PMC5550751; doi:10.1128/mbio.00822-17), 2017-08-08

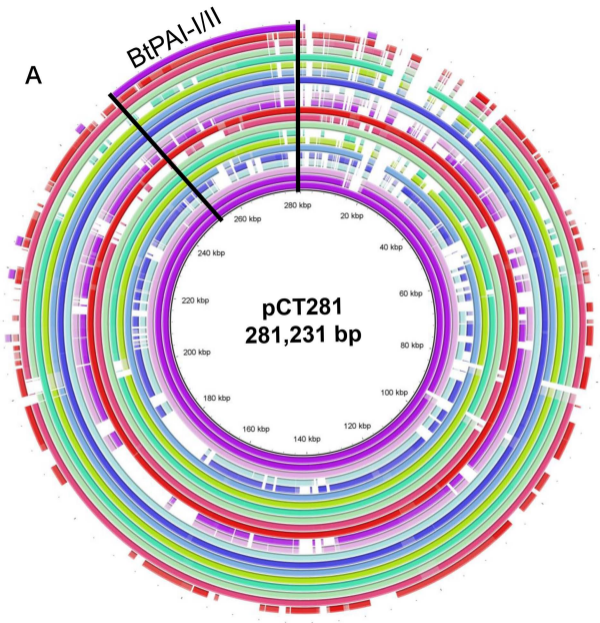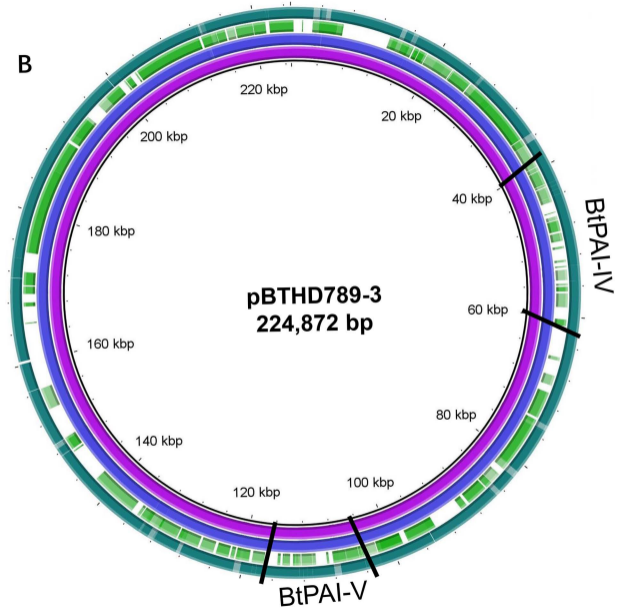

Supplement: mbo004173420sf4.pdf [file mbo004173420sf4.pdf]
